# Supplementary material for: Benchmarking infrastructure for mutation text mining
Source: PubMed Central journal article supplement (PMC3939821; doi:10.1186/2041-1480-5-11), 2014-02-25
Supplement: 2041-1480-5-11-S1.pdf [file 2041-1480-5-11-S1.pdf]

## Additional file 1

Publication: “Benchmarking infrastructure for mutation text mining”

Authors: Artjom Klein, Alexandre Riazanov, Matthew M Hindle and Christopher JO Baker

### 1. Example evaluation queries

We illustrate a specific example of a metric SPARQL query by presenting a slightly simplified version of the query used to select the correct results from mutation-impact relation extraction.

According to the definitions in evaluation task (T2) – *evaluation of extraction of mutation impacts on molecular functions of proteins*, a result was defined as a tuple – a *document*, a *mutation*, a *protein property* changed by the mutation, and a *direction* of the property change. If the gold standard data RDF graph contained a corresponding subgraph, the result was considered *correct*. Technically we had to compare two named RDF graphs and obtain the corresponding intersection. The resulting query below assumes that the gold-standard data is kept in the named graph `http://example.com/gold-standard.rdf` and the system results came from another named graph `http://example.com/experiment.rdf`.

Note that, as in the modelling example, we replace non-mnemonic SIO identifiers with their labels, for better readability,

```
SELECT DISTINCT ?pubmed_id ?mut_id ?protein_property_class ?property_change_class
WHERE {
  GRAPH <http://example.com/gold-standard.rdf> {
    ?document a sio:'article';
    sio:'is subject of'
      [ a lsrn:PMID_Record;
        sio:'has attribute'
          [ a lsrn:PMID_Identifier;
            sio:'has value' ?pubmed_id ] . ] .

    ?ann_mutation a ao:Annotation;
    aof:annotatesDocument ?document;
    ao:hasTopic ?mutation .

    ?mutation a mieo:CombinedAminoAcidSequenceChange;
    sio:'has unique identifier'
      [ a mieo:CombinedAminoAcidSequenceChange_Identifier;
        sio:'has value' ?mut_id ] .

    ?ann_mutation_application a ao:Annotation;
    aof:annotatesDocument ?document;
    ao:hasTopic
      [ a mieo:ProteinMutationApplication;
        mieo:isApplicationOfMutation ?mutation ] .

    ?ann_statement_of_mutation_effect a ao:Annotation;
    aof:annotatesDocument ?document;
    ao:hasTopic
      [ a mieo:StatementOfMutationEffect;
        mieo:arg1 ?mutation_application;
        mieo:arg2 ?property_change ] .

    ?ann_property_change a ao:Annotation;
    aof:annotatesDocument ?document;
    ao:hasTopic ?property_change .

    ?property_change a ?property_change_class;
    mieo:propertyChangeAppliesTo ?protein_property .
```

```

?property_change_class rdfs:subClassOf mieo:ProteinPropertyChange .

?ann_protein_property a ao:Annotation;
  aof:annotatesDocument ?document;
  ao:hasTopic ?protein_property .
?protein_property a ?protein_property_class .
?protein_property_class rdfs:subClassOf mieo:ProteinProperty .
}
GRAPH <http://example.com/experiment.rdf> {
?document2 a sio:'article';
  sio:'is subject of'
    [ a lsrn:PMID_Record;
      sio:'has attribute'
        [ a lsrn:PMID_Identifier;
          sio:'has value' ?pubmed_id ] . ] .

?ann_mutation2 a ao:Annotation;
  aof:annotatesDocument ?document2;
  ao:hasTopic ?mutation2 .
?mutation2 a mieo:CombinedAminoAcidSequenceChange;
  sio:'has unique identifier'
    [ a mieo:CombinedAminoAcidSequenceChange_Identifier;
      sio:'has value' ?mut_id ] .

?ann_mutation_application2 a ao:Annotation;
  aof:annotatesDocument ?document2;
  ao:hasTopic
    [ a mieo:ProteinMutationApplication;
      mieo:isApplicationOfMutation ?mutation2 ] .

?ann_statement_of_mutation_effect2 a ao:Annotation;
  aof:annotatesDocument ?document2;
  ao:hasTopic
    [ a mieo:StatementOfMutationEffect;
      mieo:arg1 ?mutation_application2;
      mieo:arg2 ?property_change2 ] .

?ann_property_change2 a ao:Annotation;
  aof:annotatesDocument ?document2;
  ao:hasTopic ?property_change2 .
?property_change2 a ?property_change_class;
  mieo:propertyChangeAppliesTo ?protein_property2 .

?property_change_class rdfs:subClassOf mieo:ProteinPropertyChange .

?ann_protein_property2 a ao:Annotation;
  aof:annotatesDocument ?document2;
  ao:hasTopic ?protein_property2 .
?protein_property2 a ?protein_property_class .
?protein_property_class rdfs:subClassOf mieo:ProteinProperty .
}
}

```

We comment briefly on the query composition. The two halves of the query (lines 5-35 and 36-66) correspond to the selection of relevant data from the gold standard corpora and from the experimental system results. Since our goal was to select only *correct* results, the two selections were joined on the instances of the variables `?pubmed_id` (identifying documents), `?wt_residue`, `?mut_residue` and `?position_value` (for the wild-type and mutant residues, and positions of the corresponding mutations), `?protein_property_class` (identifying studied properties) and `?property_change_class` (identifying the direction of the property change).

Note that the query could only be used to implement *micro averaging* that treats the whole corpus as one large document. If, for some reason, we were interested in *macro averaging* or needed to see performance

results for separate documents, we could have additionally grouped the results by the PubMed identifier values.

The following SPARQL query retrieved the correct results of *Impact Sentence Recognition* (T3).

`?text_selector` identifies the fragment of text referring to an impact modelled as an instance of `ProteinPropertyChange` class. Since impact sentences in the available corpora did not have exact start and end positions, we implemented an alignment procedure (see *Utilities* section for details) to match corresponding text fragments and connect corresponding `text selectors` via instance of `StringSimilarity`. Alignment of similar text fragments were applied before running the query.

```
SELECT DISTINCT ?pubmed_id ?property_change ?text_selector
WHERE {
  GRAPH <http://example.com/gold-standard.rdf> {
    ?document a sio:'article';
      sio:'is subject of'
        [ a lsrn:PMID_Record;
          sio:'has attribute'
            [ a lsrn:PMID_Identifier;
              sio:'has value' ?pubmed_id ] . ] .

    ?ann a ao:Annotation;
      aof:annotatesDocument ?document;
      ao:hasTopic ?property_change .

    ?property_change a ?property_change_class .
    ?property_change_class rdfs:subClassOf mieo:ProteinPropertyChange .

    ?ann ao:context ?text_selector .
    ?text_selector a aos:TextSelector .
  }
  GRAPH <http://example.com/experiment.rdf> {
    ?document2 a sio:'article';
      sio:'is subject of'
        [ a lsrn:PMID_Record;
          sio:'has attribute'
            [ a lsrn:PMID_Identifier;
              sio:'has value' ?pubmed_id ] . ] .

    ?ann2 a ao:Annotation;
      aof:annotatesDocument ?document2;
      ao:hasTopic ?property_change2 .
    ?property_change2 a ?property_change_class2 .
    ?property_change_class2 rdfs:subClassOf mieo:ProteinPropertyChange .

    ?ann2 ao:context ?text_selector2 .
    ?text_selector2 a aos:TextSelector .
  }
  ?sim a mieo:StringSimilarity .
  ?text_selector sio:'has attribute' ?sim .
  ?text_selector2 sio:'has attribute' ?sim .
}
```

Since precision and recall formulas represent relatively simple arithmetic, they can be also calculated in a SPARQL query combining the SPARQL queries calculating correct, retrieved, and relevant result sets, if this is convenient.

## 2. Example analysis query

We found SPARQL useful in analysis of results and helping us in debugging tasks. E.g. the SPARQL negation-related features proved especially useful because they allowed us to identify *false negatives* – cases presented in gold standard and absent from system results, thus identifying potential targets for optimisation. The following query represents such a use case where the `FILTER NOT EXISTS` feature is applied to exclude correct system results for mutation grounding from the set of all results:

```
SELECT DISTINCT ?pubmed_id ?wt_residue ?position_value ?mut_residue ?uniprot_record_id
WHERE {
  GRAPH <http://example.com/gold-standard.rdf> {
    ?document a sio:'article';
    sio:'is subject of'
      [ a lsrn:PMID_Record;
        sio:'has attribute'
          [ a lsrn:PMID_Identifier;
            sio:'has value' ?pubmed_id ] . ] .

    ?ann_mutation a ao:Annotation;
    aof:annotatesDocument ?document;
    ao:hasTopic ?mutation .
    ?mutation a mieo:CombinedAminoAcidSequenceChange;
    sio:'has member' ?singular_mutation .
    ?singular_mutation a mieo:AminoAcidSubstitution;
    mieo:mutationHasWildtypeResidue ?wt_residue;
    mieo:mutationHasMutantResidue ?mut_residue;
    mieo:mutationHasPosition
      [ a sio:'position';
        sio:'has value' ?position_value ] .

    ?ann_mutation_application a ao:Annotation;
    aof:annotatesDocument ?document;
    ao:hasTopic
      [ a mieo:ProteinMutationApplication;
        mieo:isApplicationOfMutation ?mutation;
        mieo:isApplicationOfMutationToProtein ?protein ] .

    ?ann_protein a ao:Annotation;
    aof:annotatesDocument ?document;
    ao:hasTopic ?protein .
    ?protein a mieo:ProteinVariant;
    sio:'is subject of'
      [ a lsrn:UniProt_Record;
        sio:'has attribute'
          [ a lsrn:UniProt_Identifier;
            sio:'has value' ?uniprot_record_id ] . ] .
    FILTER (?uniprot_record_id != "")
  }
  FILTER NOT EXISTS {
    GRAPH <http://example.com/experiment.rdf> {
      ?document2 a sio:'article';
      sio:'is subject of'
        [ a lsrn:PMID_Record;
          sio:'has attribute'
            [ a lsrn:PMID_Identifier;
              sio:'has value' ?pubmed_id ] . ] .

      ?ann_mutation2 a ao:Annotation;
      aof:annotatesDocument ?document2;
      ao:hasTopic ?mutation2 .
      ?mutation2 a mieo:CombinedAminoAcidSequenceChange;
      sio:'has member' ?singular_mutation2 .
      ?singular_mutation2 a mieo:AminoAcidSubstitution;
      mieo:mutationHasWildtypeResidue ?wt_residue;
      mieo:mutationHasMutantResidue ?mut_residue;
      mieo:mutationHasPosition
        [ a sio:'position';
          sio:'has value' ?position_value ] .
    }
  }
}
```

```

?ann_mutation_application2 a ao:Annotation;
  aof:annotatesDocument ?document2;
  ao:hasTopic
    [ a mieo:ProteinMutationApplication;
      mieo:isApplicationOfMutation ?mutation2;
      mieo:isApplicationOfMutationToProtein ?protein2 ] .

?ann_protein2 a ao:Annotation;
  aof:annotatesDocument ?document2;
  ao:hasTopic ?protein2 .
?protein2 a mieo:ProteinVariant;
  sio:'is subject of'
    [ a lsrn:UniProt_Record;
      sio:'has attribute'
        [ a lsrn:UniProt_Identifier;
          sio:'has value' ?uniprot_record_id ] . ] .
FILTER (?uniprot_record_id != "")
}
}
}

```
